# Supplementary material
Source: PubMed Central journal article supplement (PMC4657835)

## SUPPLEMENTARY ONLINE TABLES AND FIGURES

**Supplementary Table 1. Criteria and reasons for commencing RRT and renal function at 1 year of follow-up:** Chart analysis of individual patients on criteria for starting RRT, along with follow-up data at 1 year, both mortality and renal function. \*: patients on dialysis pre-operatively were excluded. ATN: acute tubular necrosis; CKD: chronic kidney disease; eGFR: estimated glomerular filtration rate; ESRD: end-stage renal disease; HD: hemodialysis; RRT: renal replacement therapy.

| Patient | Dexamethasone? | eGFR < 15 pre-operatively* | RRT commencement criteria and cause           | Death <30 days | Death < 1 year | Renal function and mortality after 1 year |
|---------|----------------|----------------------------|-----------------------------------------------|----------------|----------------|-------------------------------------------|
| 1       | Yes            | Yes                        | Hyperkalemia                                  | No             | No             | CKD stage 3                               |
| 2       | Yes            | No                         | Anuria due to ATN                             | Yes            | Yes            | -                                         |
| 3       | Yes            | Yes                        | Anuria due to Sepsis and metabolic acidosis   | No             | Yes            | -                                         |
| 4       | No             | No                         | Oliguria due to ATN                           | No             | No             | No CKD                                    |
| 5       | No             | No                         | Anuria due to ATN                             | No             | No             | ESRD on HD; death 4 years after surgery   |
| 6       | Yes            | Yes                        | Anuria due to ATN                             | No             | No             | CKD stage 4                               |
| 7       | No             | Yes                        | Unknown                                       | No             | Yes            | -                                         |
| 8       | No             | No                         | Anuria due to ATN                             | No             | Yes            | -                                         |
| 9       | No             | Yes                        | Hyperkalemia                                  | No             | No             | CKD stage 4                               |
| 10      | Yes            | No                         | Anuria due to diuretics-induced renal failure | No             | No             | CKD stage 3                               |
| 11      | No             | Yes                        | Oliguria due to ATN                           | No             | No             | CKD stage 4; death 5 years after surgery  |
| 12      | No             | Yes                        | Oliguria due to ATN                           | Yes            | Yes            | -                                         |
| 13      | Yes            | No                         | Progressive metabolic acidosis                | No             | No             | CKD stage 4                               |
| 14      | No             | Yes                        | Anuria due to ATN                             | No             | No             | CKD stage 4                               |
| 15      | Yes            | No                         | Anuria due to ATN                             | No             | Yes            | -                                         |
| 16      | No             | No                         | Oliguria due to ATN                           | No             | No             | CKD stage 2                               |
| 17      | No             | Yes                        | Oliguria due to septic shock                  | Yes            | Yes            | -                                         |
| 18      | No             | Yes                        | Progressive metabolic acidosis and ATN        | No             | No             | CKD stage 3                               |
| 19      | No             | Yes                        | Anuria due to ATN                             | No             | No             | ESRD on HD                                |
| 20      | Yes            | No                         | Anuria due to ATN                             | No             | No             | Unknown                                   |
| 21      | No             | No                         | Oliguria due to ATN                           | Yes            | Yes            | -                                         |
| 22      | No             | Yes                        | Oliguria after forward cardiac failure        | No             | No             | CKD stage 2                               |

|    |     |     |                                                         |     |     |             |
|----|-----|-----|---------------------------------------------------------|-----|-----|-------------|
| 23 | No  | No  | Anuria due to ATN                                       | Yes | Yes | -           |
| 24 | No  | Yes | Anuria due to ATN                                       | No  | No  | CKD stage 4 |
| 25 | No  | Yes | Anuria due to ATN                                       | No  | Yes | -           |
| 26 | No  | No  | Anuria after forward cardiac failure                    | No  | No  | CKD stage 3 |
| 27 | No  | No  | Hyperkalemia                                            | No  | No  | CKD stage 4 |
| 28 | No  | Yes | Oliguria due to ATN                                     | No  | No  | CKD stage 4 |
| 29 | No  | No  | Hyperkalemia and oliguria after forward cardiac failure | Yes | Yes | -           |
| 30 | Yes | No  | Anuria due to ATN                                       | Yes | Yes | -           |
| 31 | No  | Yes | Hyperkalemia and metabolic acidosis                     | No  | No  | ESRD on HD  |
| 32 | Yes | No  | Oliguria due to ATN                                     | No  | No  | CKD stage 2 |
| 33 | No  | Yes | Anuria after forward cardiac failure and ATN            | Yes | Yes | -           |

### Legends to Supplemental Figures

**Supplemental Figure 1. Enrolment flowchart.** DECS: Dexamethasone for Cardiac Surgery.

**Figure 1.**

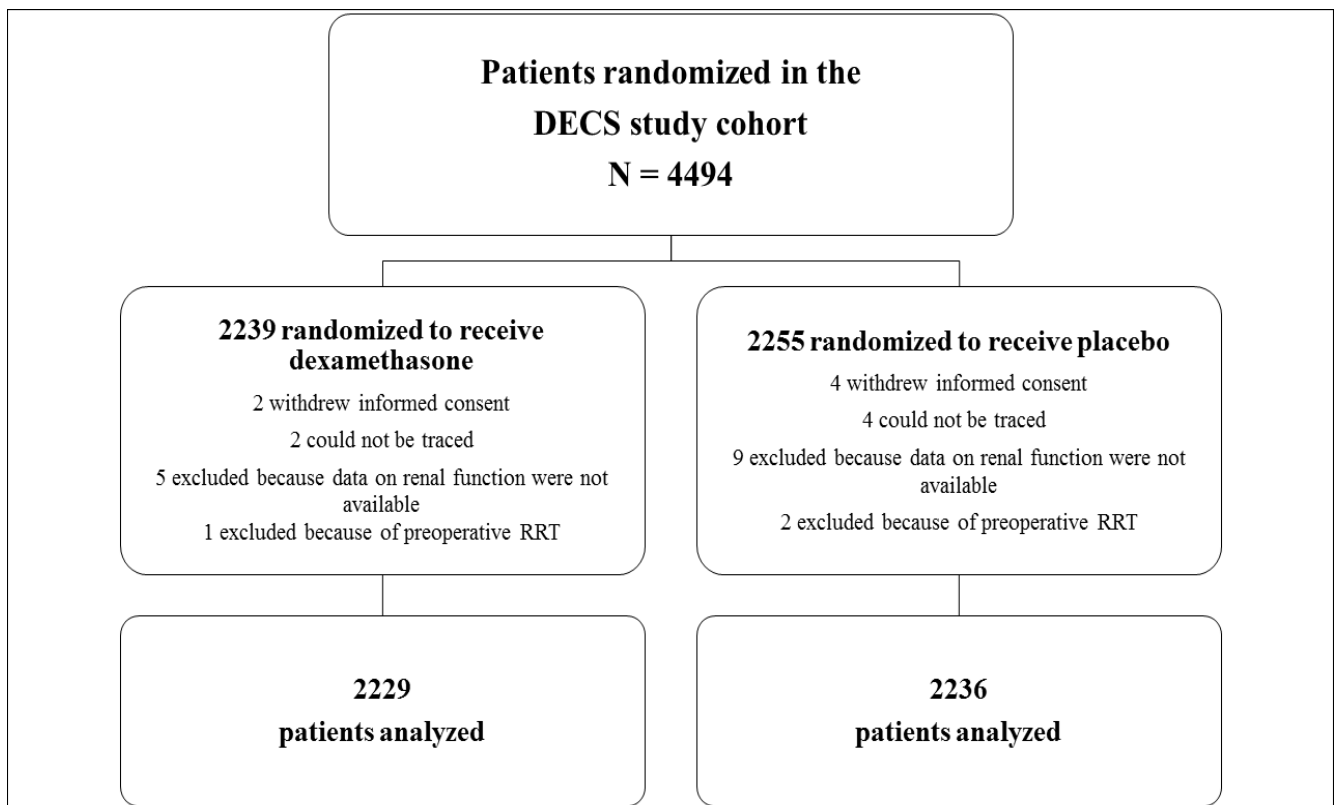

Supplement: ASN.2014080840_ASN2014080840SupplementaryData.pdf [file ASN.2014080840_ASN2014080840SupplementaryData.pdf]
